# Supplementary material for: Protein-resistant polymer surfaces
Source: Royal Society of Chemistry journal article supplement (doi:10.1039/c2jm30820g), 2012-01-01
Supplement: c2jm30820g.pdf [file c2jm30820g.pdf]

## Protein-resistant polymer surfaces

Wörz, A.; Berchtold, B.; Moosmann, K.; Prucker, O.; Rühle, J.\*

### Supplementary information

5

Table S1: List of swelling degree (DS) and water uptake (W) of the used polymers

| Polymer                              | DS (in water)                      | W (in water)                       |
|--------------------------------------|------------------------------------|------------------------------------|
| <i>hydrophobic polymers</i>          |                                    |                                    |
| PS                                   | 1                                  | 0                                  |
| PMMA                                 | 1                                  | 0                                  |
| PFA                                  | 1                                  | 0                                  |
| <i>hydrophilic polymers</i>          |                                    |                                    |
| <i>PMMA-PEG(n)</i>                   |                                    |                                    |
| <i>n</i> = 0                         | 1                                  | 0                                  |
| 1                                    | 1.04                               | 4                                  |
| 2                                    | 1.2                                | 20                                 |
| 7,3 <sup>a</sup>                     | 1.53                               | 53                                 |
| 22,8                                 | 2.9                                | 190                                |
| <i>PDMAAm - X% MMA</i>               |                                    |                                    |
| <i>X</i> = 0                         | 2.3                                | 130                                |
| 0.5                                  | 2.4                                | 140                                |
| 1                                    | 2.4                                | 140                                |
| 2.5                                  | 2.25                               | 125                                |
| 5                                    | 2.6                                | 160                                |
| 10                                   | 2.5                                | 150                                |
| 20                                   | 2.65                               | 165                                |
| 40                                   | 2.05                               | 105                                |
| 60                                   | 1.18                               | 18                                 |
| 80                                   | 1.04                               | 4                                  |
| 90                                   | 1.03                               | 3                                  |
| 100                                  | 1                                  | 0                                  |
| PHEMA                                | 1.65                               | 65                                 |
| <i>anionic hydrophilic polymers</i>  |                                    |                                    |
| PAA                                  | 1 <sup>b</sup><br>4.7 <sup>c</sup> | 0 <sup>b</sup><br>370 <sup>c</sup> |
| PDMAAm-AA                            | 2.88                               | 188                                |
| PDMAAm - SSNa                        | 2.35<br>2.35 <sup>d</sup>          | 135<br>135 <sup>d</sup>            |
| PDMAAm - SAK                         | 4.30<br>4.25 <sup>d</sup>          | 330<br>325 <sup>d</sup>            |
| <i>cationic hydrophilic polymers</i> |                                    |                                    |
| PMTA                                 | - <sup>e</sup>                     | - <sup>e</sup>                     |

<sup>a</sup> contains 5% MABP

<sup>b</sup> in TRIS buffer with 0.1 M CaCl<sub>2</sub>

<sup>c</sup> in TRIS buffer with 0.2 M NaCl

<sup>d</sup> in PBS

<sup>e</sup> thick layers were unstable, so that the swelling could not be measured

Table S2: Dependency of fibrinogen adsorption to the HEMA content in PDMAAm – X% HEMA copolymers

---

| <b>PDMAAm- X%<br/>HEMA</b> | <b>fibrinogen adsorption<br/>swollen (nm ± 0.5nm)</b> | <b>fibrinogen<br/>adsorption<br/>dry (nm ± 0.5nm)</b> |
|----------------------------|-------------------------------------------------------|-------------------------------------------------------|
| X = 100                    | 1.2                                                   | 6.4                                                   |
| 95                         | 1.5                                                   | 2.0                                                   |
| 90                         | 2.0                                                   | 2.5                                                   |
| 80                         | 1.2                                                   | 1.5                                                   |
| 60                         | 1.1                                                   | 0.5                                                   |
| 40                         | 0                                                     | 0                                                     |
| 0                          | 0                                                     | 0                                                     |
